# Supplementary material for: A Systematic Review of Biochar Research, with a Focus on Its Stability in situ and Its Promise as a Climate Mitigation Strategy
Source: PubMed Central journal article supplement (PMC3786913; doi:10.1371/journal.pone.0075932), 2013-09-30

Figure S1. PRISMA flow diagram for literature search.

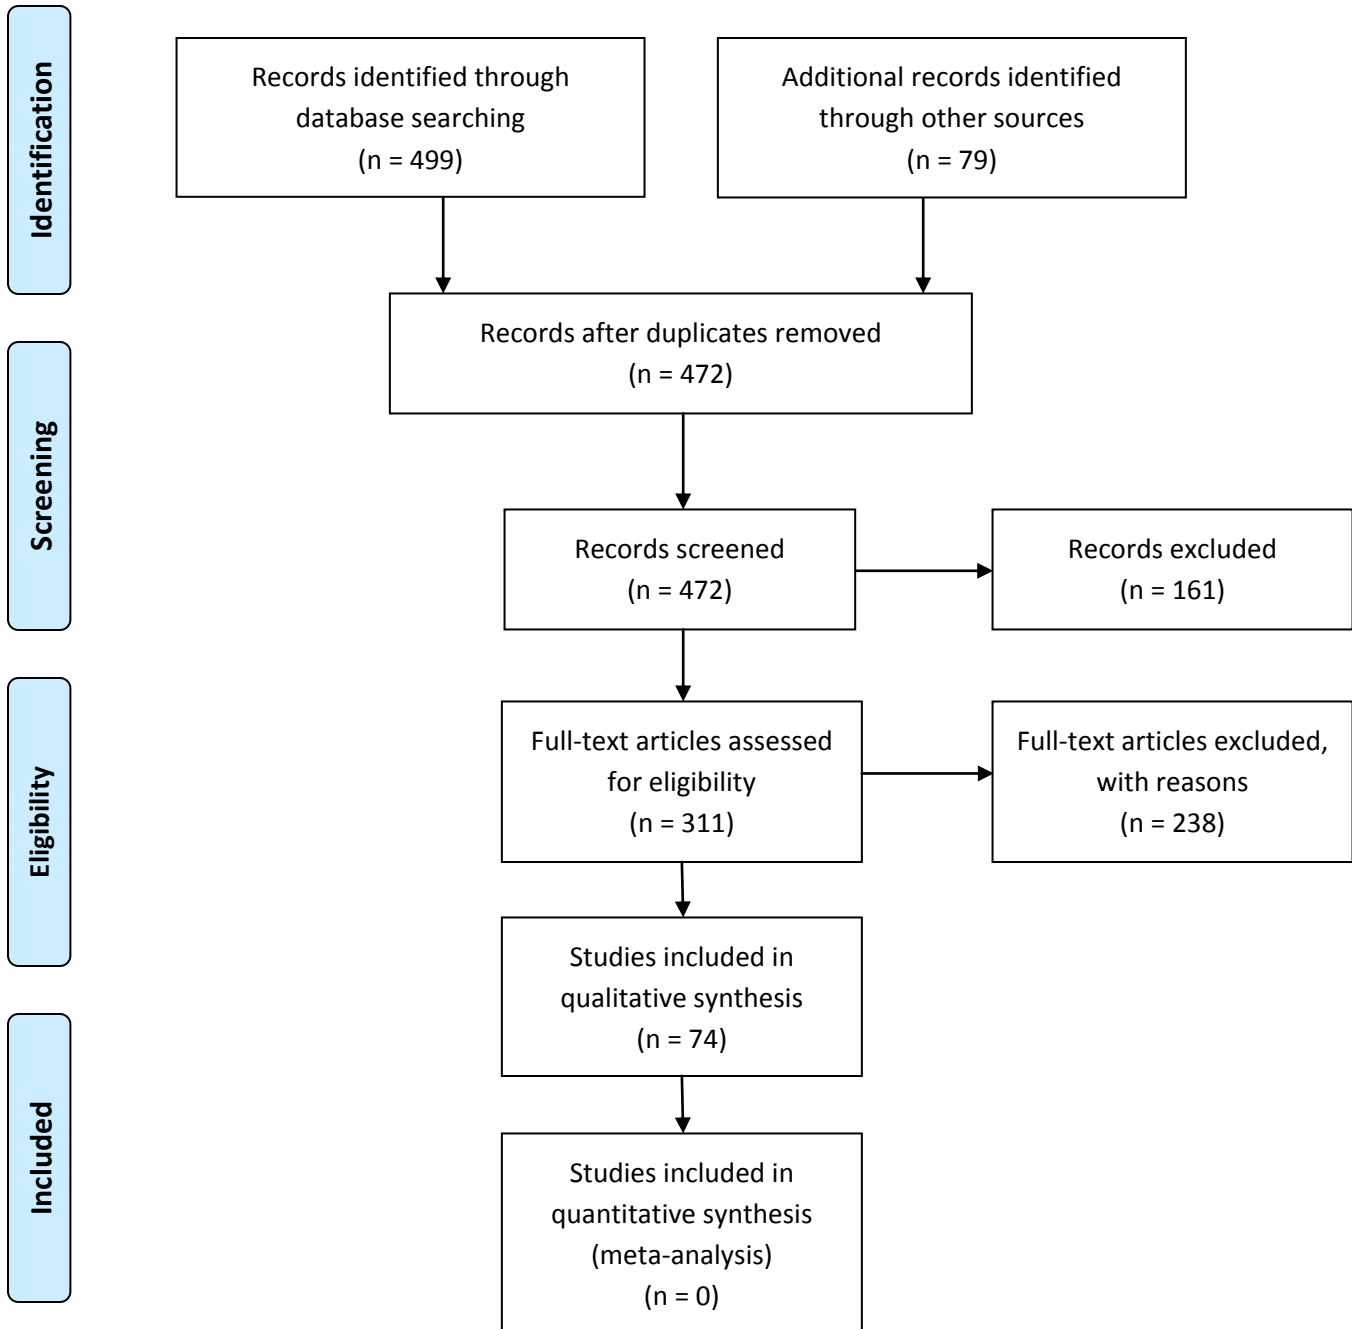

Supplement: pone.0075932.s001.pdf [file pone.0075932.s001.pdf]
